# Supplementary material for: Room temperature solution processed tungsten carbide as an efficient hole extraction layer for organic photovoltaics
Source: Royal Society of Chemistry journal article supplement (doi:10.1039/c3ta13473c), 2013-12-16
Supplement: c3ta13473c.pdf [file c3ta13473c.pdf]

Electronic Supplementary Information

## Room Temperature Solution Processed Tungsten Carbide As An Efficient Hole Extraction Layer for Organic Photovoltaics

Wei Cui,<sup>†a</sup> Zhongwei Wu,<sup>†a</sup> Changhai Liu,<sup>a</sup> Mingxing Wu,<sup>b</sup> Tingli Ma,<sup>b</sup> Suidong Wang,<sup>a</sup> Shuit-Tong Lee,<sup>a</sup> Baoquan Sun<sup>\*,a</sup>

<sup>a</sup>Jiangsu Key Laboratory for Carbon-Based Functional Materials & Devices, Institute of Functional Nano & Soft Materials (FUNSOM), Soochow University, Suzhou 215123, P. R. China

<sup>b</sup>State Key Laboratory of Fine Chemicals, Dalian University of Technology, No. 2 Linggong Road, Ganjingzi District, Dalian City, Liaoning Province, P. R. China 116024

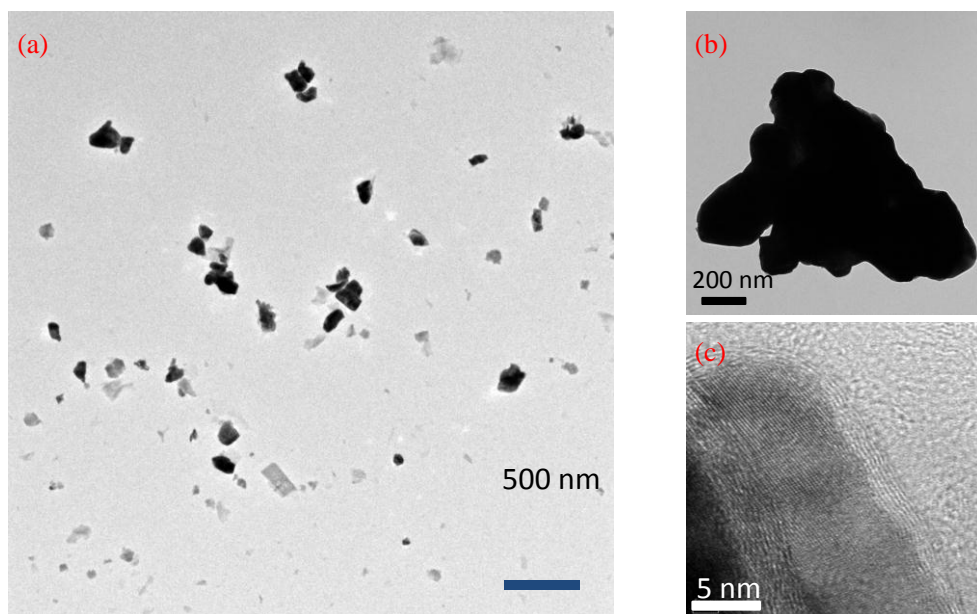

**Figure S1** TEM images of (a) the WC nanoparticles after ultrasonication, (b) WC bulk and (c) nanoparticle.

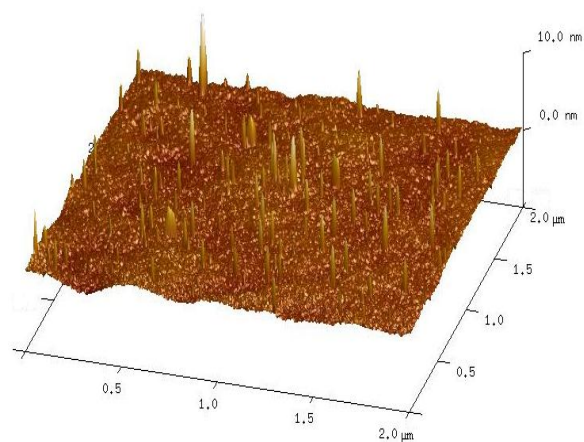

**Figure S2** AFM topographic 3-dimension image of WC nanoparticles on a planar silicon substrate. The size of these images was 2 μm x 2 μm.

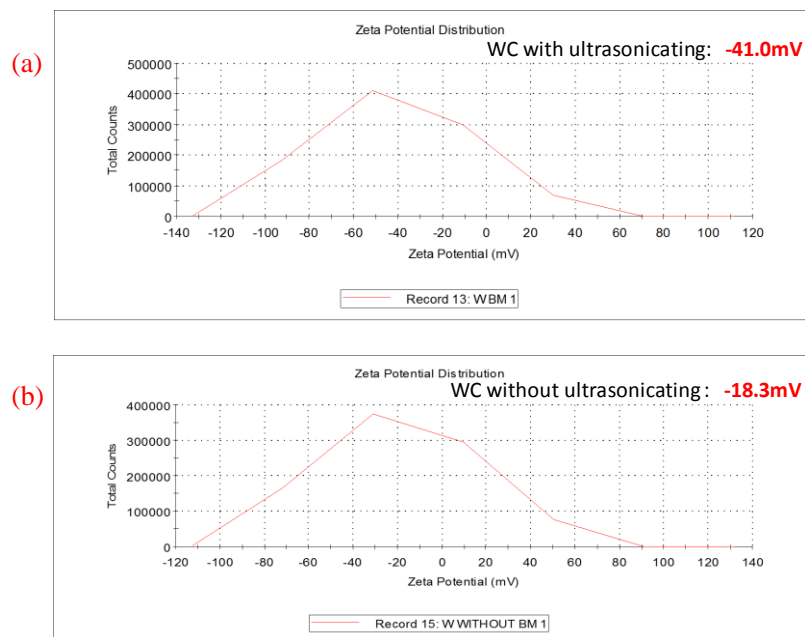

**Figure S3** Zeta potential values of WC nanoparticle (a) with and (b) without ultrasonication treatment in isopropanol.

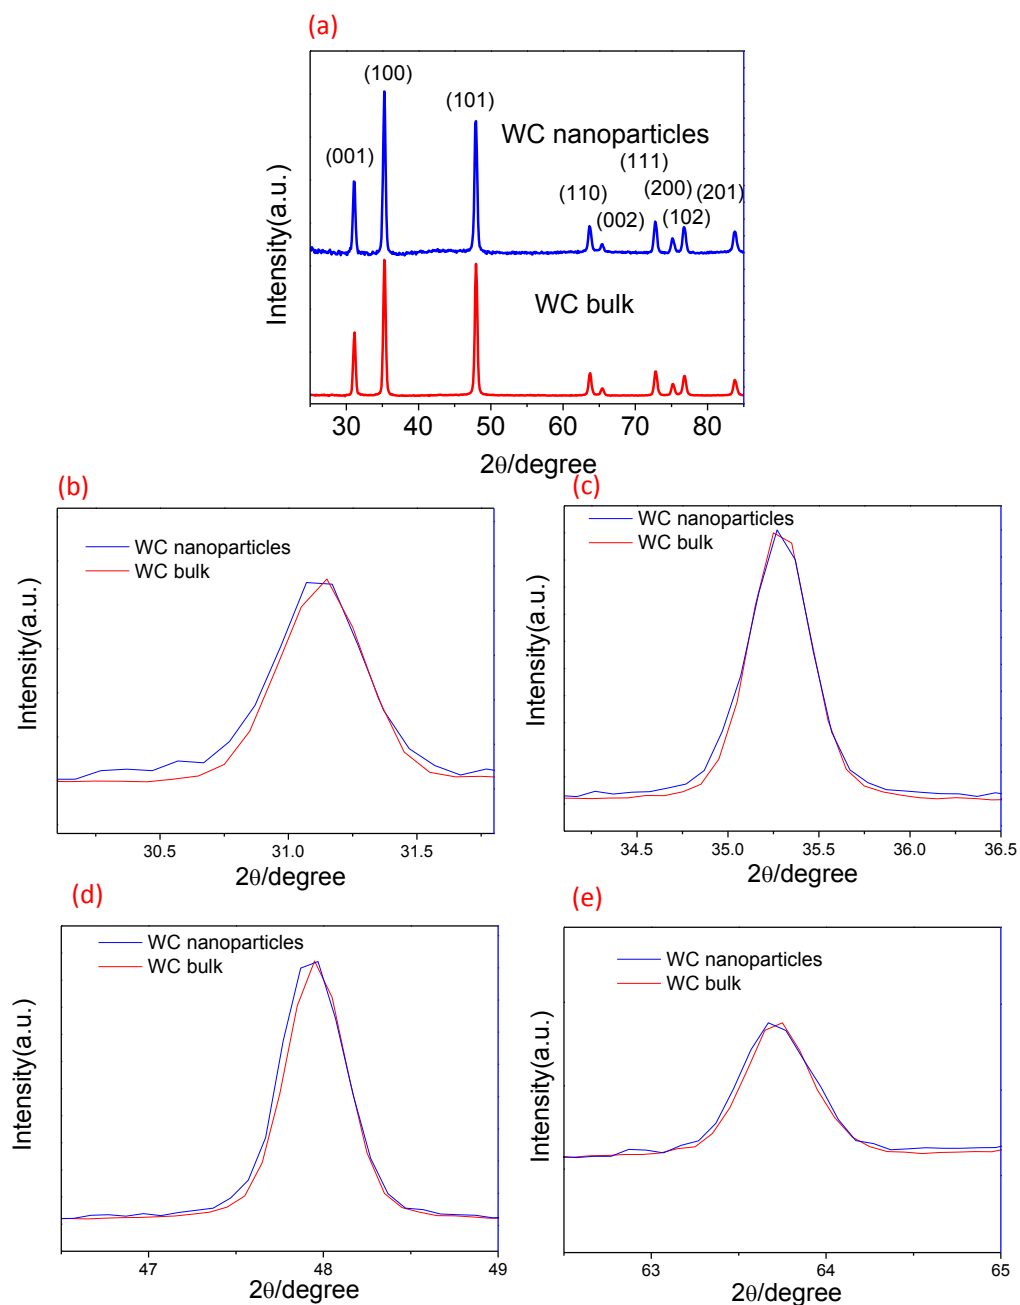

**Figure S4** (a) XRD patterns of WC bulks and nanoparticles. (b), (c), (d) and (e) represented the zoom-in XRD patterns of (001) (100) (101) (110) faces in (a), respectively.

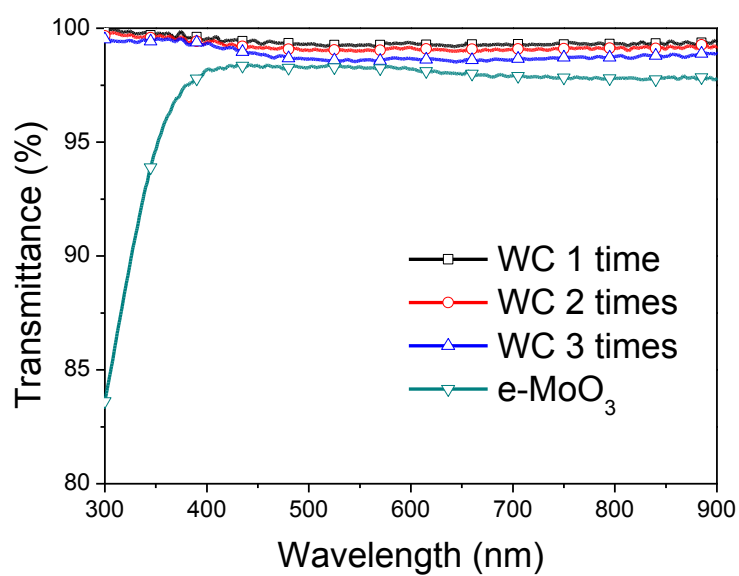

**Figure S5** Transmittance spectra of e-MoO<sub>3</sub> film and WC ones prepared by multiple spin-coating times.

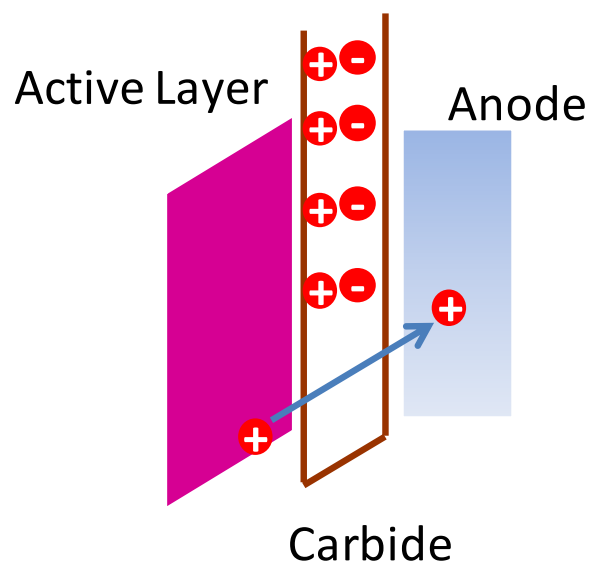

**Figure S6** The cartoon model of energy band structure, the WC interlayer under short-circuit conditions at zero external applied bias based on the probed surface dipole.

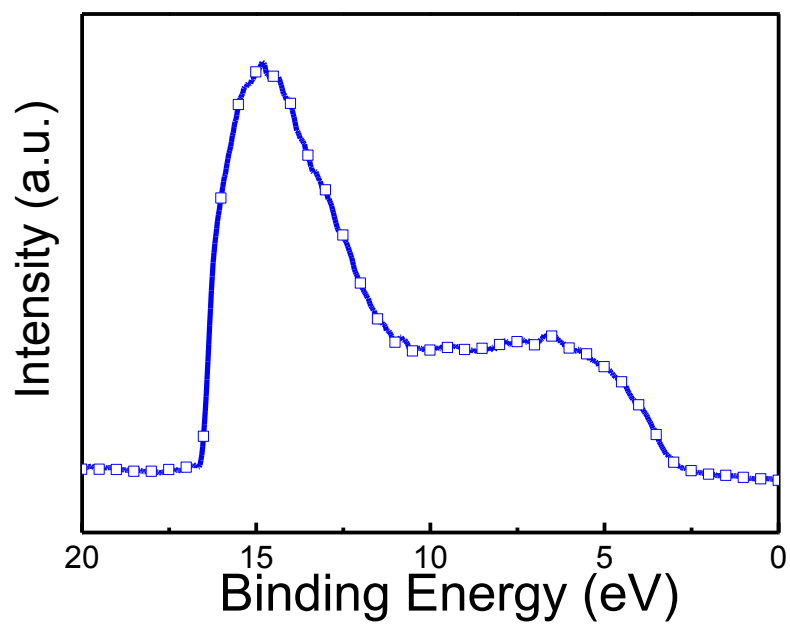

**Figure S7** UPS spectra of WC on indium substrate.

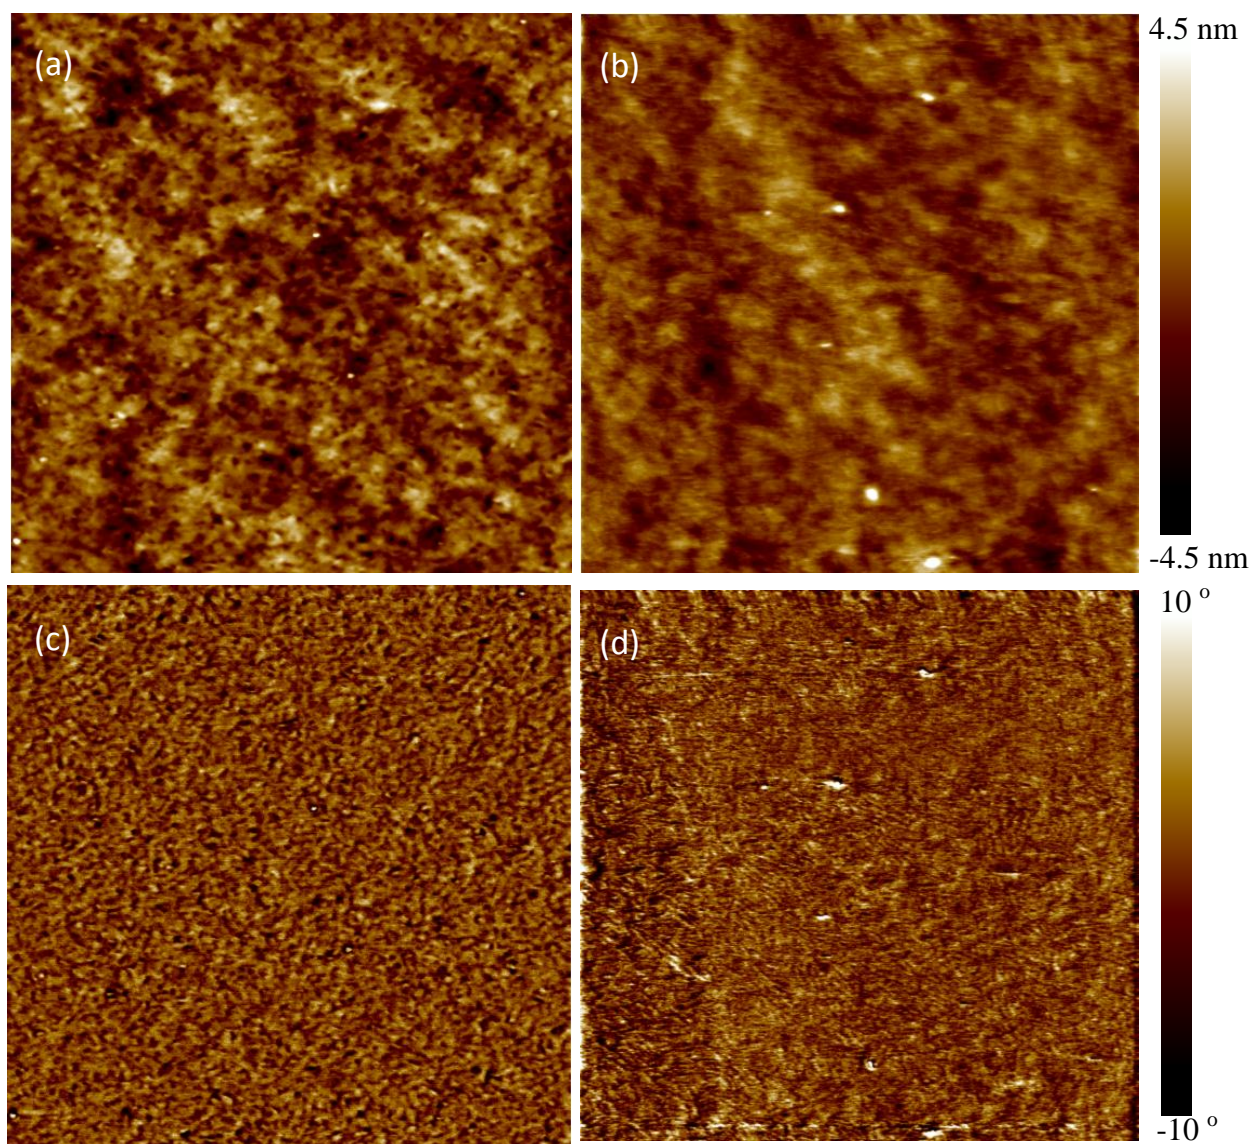

**Figure S8** AFM images of P3HT:PC<sub>61</sub>BM films with WC film deposited one time (a) Height and (c) Phase; (b) Height and (d) Phase with WC film deposited by repeated two times.



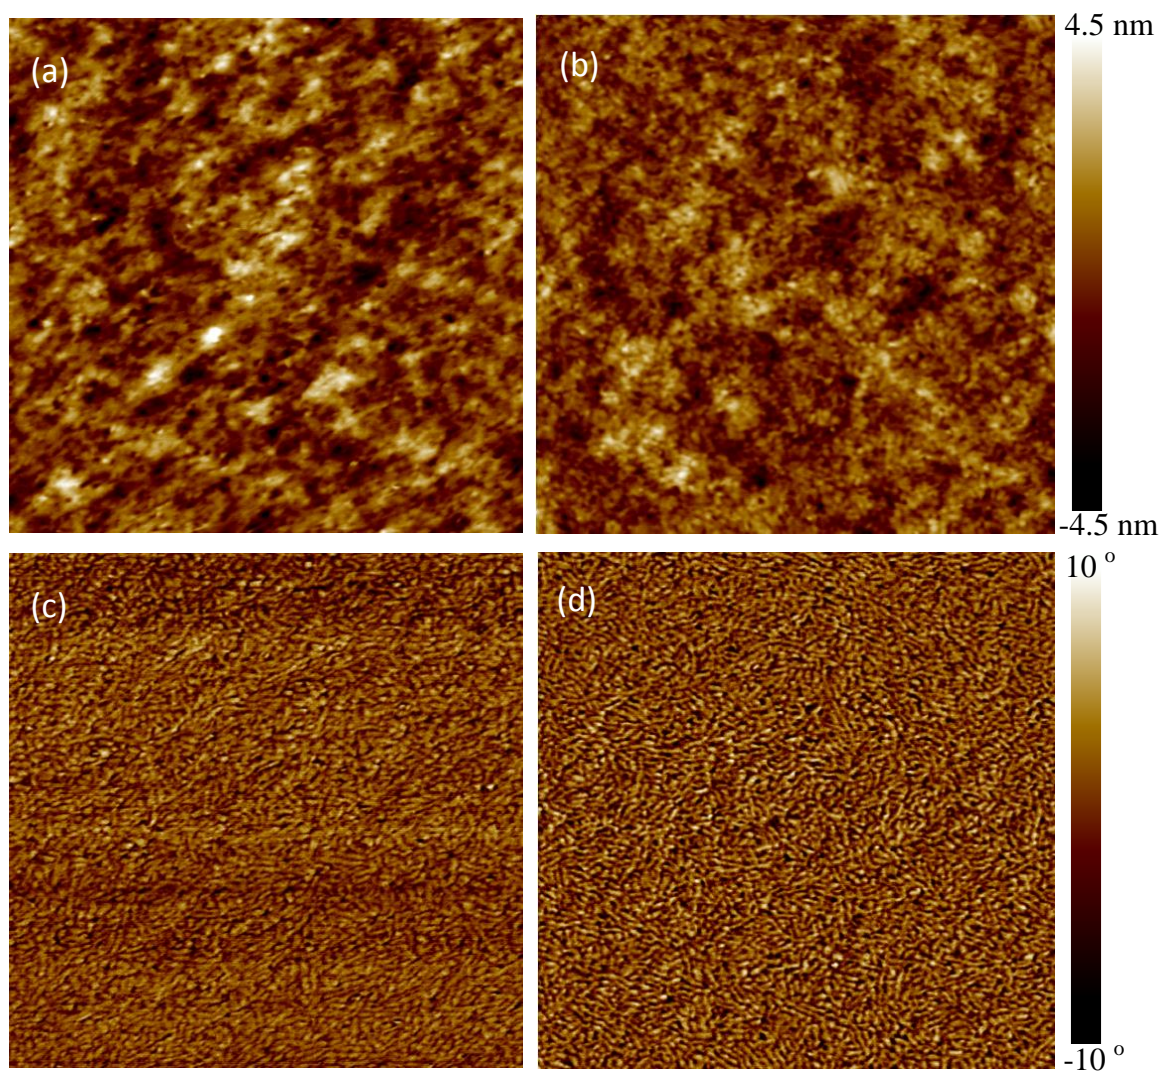

**Figure S9** AFM images of P3HT:PC<sub>61</sub>BM films with spin-coating isopropanol once (a) Height and (c) Phase; (b) Height and (d) Phase with spin-coating isopropanol in three times.

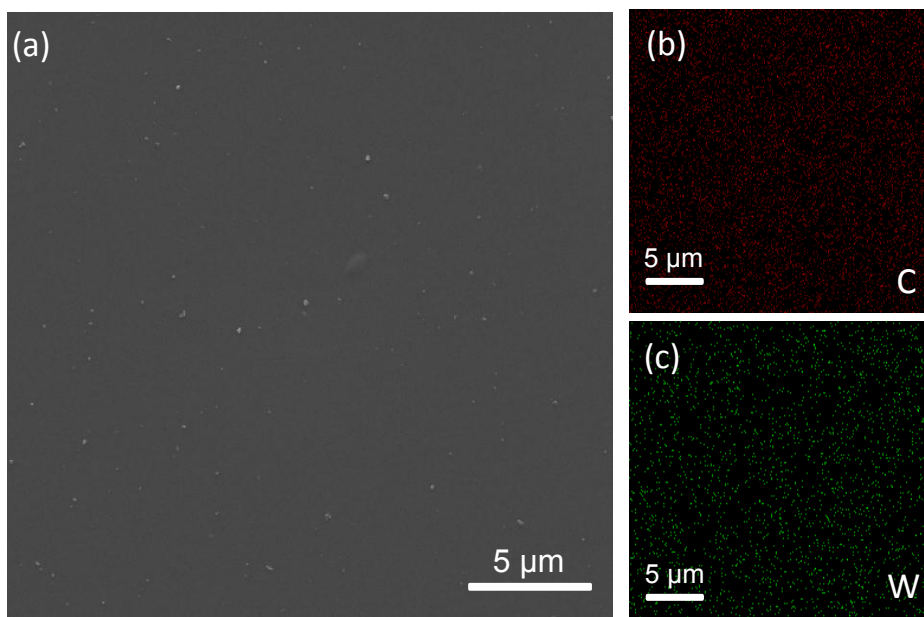

**Figure S10** (a) SEM image of the WC film deposited on P3HT:PCBM layer by spin-coating for 3 times, and corresponding elemental mapping images of (b) carbon and (c) tungsten by energy-dispersive X-ray (EDX) spectroscopy, indicating the active layer were fully covered with the WC nanoparticles.

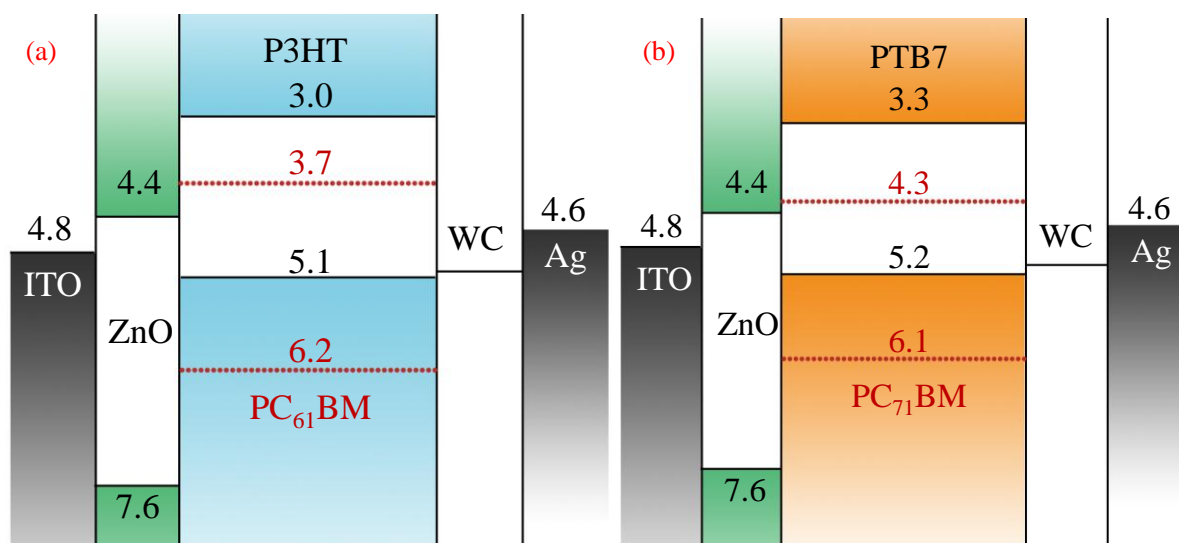

**Figure S11** The band structures of the devices with WC anode buffer layers. (a) ITO/ZnO/P3HT:PC<sub>61</sub>BM/WC/Ag, (b) ITO/ZnO/PTB7:PC<sub>71</sub>BM/WC/Ag.

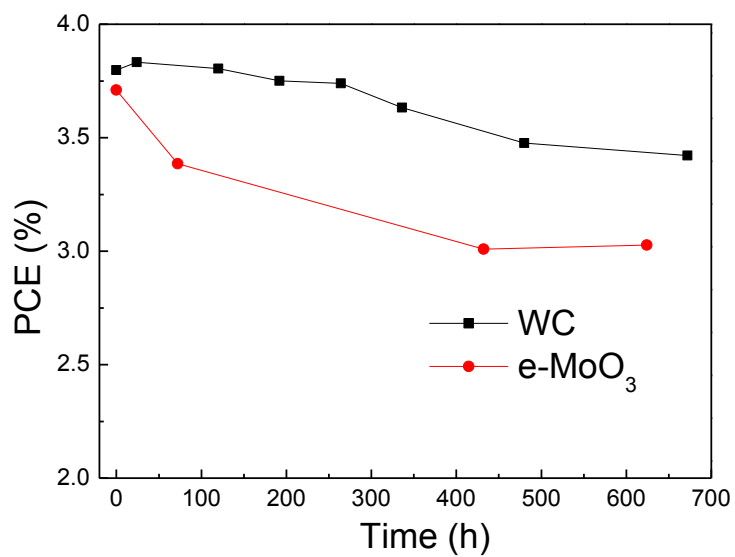

**Figure S12** PCEs as a function of storage time for P3HT:PC<sub>61</sub>BM solar cells based on different hole extraction layer of solution-processed WC and vacuum deposited MoO<sub>3</sub> in air under ambient conditions (no encapsulation).

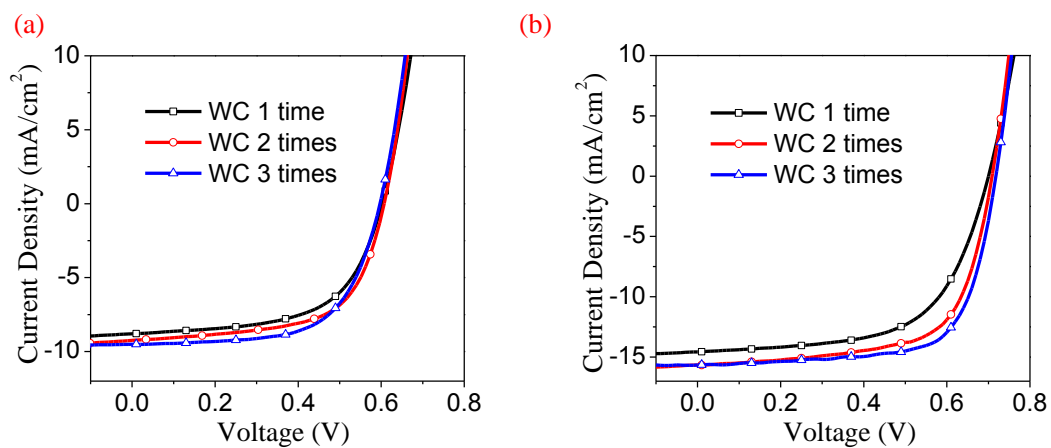

**Figure S13** J-V data for inverted solar cell based on (a) P3HT:PC<sub>61</sub>BM and (b) PTB7: PC<sub>71</sub>BM with WC buffer layers fabricated by different spin-coating times.

|                          | Spin-coating times | V <sub>oc</sub> (V) | J <sub>sc</sub> (mA cm <sup>-2</sup> ) | FF   | PCE (%) |
|--------------------------|--------------------|---------------------|----------------------------------------|------|---------|
| P3HT:PC <sub>60</sub> BM | 1                  | 0.60                | 8.78                                   | 0.60 | 3.16    |
|                          | 2                  | 0.60                | 9.25                                   | 0.63 | 3.50    |
|                          | 3                  | 0.60                | 9.51                                   | 0.64 | 3.65    |
| PTB7:PC <sub>71</sub> BM | 1                  | 0.70                | 14.55                                  | 0.61 | 6.21    |
|                          | 2                  | 0.70                | 15.66                                  | 0.67 | 7.3     |
|                          | 3                  | 0.71                | 15.64                                  | 0.71 | 7.87    |

**Table S1** Summary of electric output characteristics of the inverted solar cells with WC buffer layers fabricated by different spin-coating times.

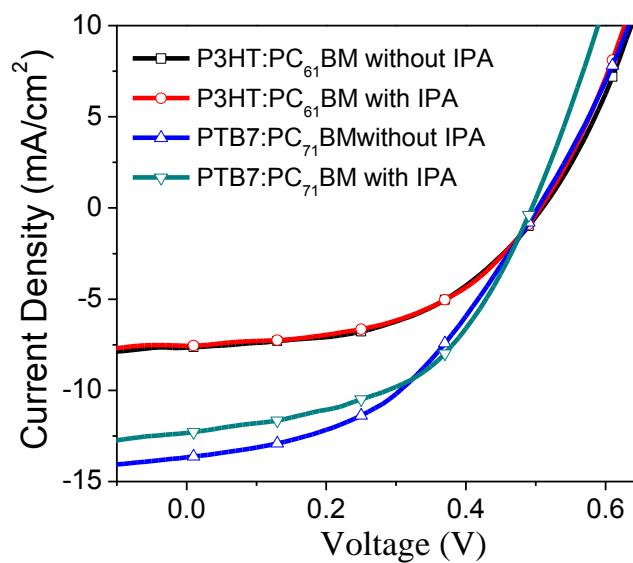

**Figure S14** J-V curves of the devices based on P3HT:PC<sub>61</sub>BM (PTB7: PC<sub>71</sub>BM) with and without isopropanol treatment. Neither MoO<sub>3</sub> nor WC is inserted between active layer and silver electrodes. The device structures were either ITO/ZnO/P3HT:PC<sub>61</sub>BM/Ag or ITO/ZnO/PTB7:PC<sub>71</sub>BM/Ag.

|                                      | $V_{oc}$<br>(V) | $J_{sc}$<br>( $\text{mA cm}^{-2}$ ) | FF   | PCE<br>(%) |
|--------------------------------------|-----------------|-------------------------------------|------|------------|
| P3HT:PC <sub>61</sub> BM without IPA | 0.50            | 7.64                                | 0.50 | 1.91       |
| P3HT:PC <sub>61</sub> BM with IPA    | 0.50            | 7.54                                | 0.51 | 1.90       |
| PTB7:PC <sub>71</sub> BM without IPA | 0.50            | 13.64                               | 0.45 | 3.06       |
| PTB7:PC <sub>71</sub> BM with IPA    | 0.50            | 12.29                               | 0.51 | 3.05       |

**Table S2** Electric output characteristics of the devices based on P3HT:PC<sub>61</sub>BM (PTB7: PC<sub>71</sub>BM) with and without isopropanol treatment. Neither MoO<sub>3</sub> nor WC was inserted between active layer and silver electrodes. The device structures were either ITO/ZnO/P3HT:PC<sub>61</sub>BM/Ag or ITO/ZnO/PTB7:PC<sub>71</sub>BM/Ag.
